# Supplementary material
Source: publisher site journal article supplement (https://www.e-cmh.org/upload/media/cmh-2022-0327-Supplementary-Fig-2.pdf)
Supplement: Supplementary file 1 [file cmh-2022-0327-Supplementary-Fig-2.pdf]

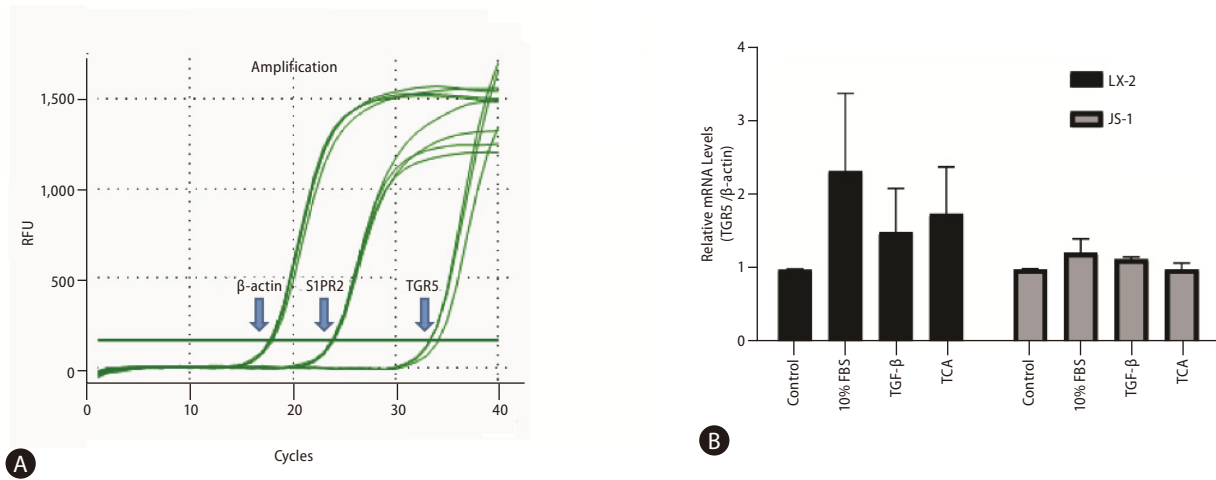

**Supplementary Figure 2.** The expression of bile acid-related cell surface receptors TGR5 and S1PR2 in HSCs. Amplification plot of S1PR2 and TGR5 expression in LX-2 cells by real-time RT-PCR (A). TGR5 mRNA levels in quiescent and activated HSCs (B). TGR5, GPBAR1; S1PR2, sphingosine 1-phosphate receptor 2; HSCs, hepatic stellate cells; TCA, taurocholic acid; FBS, fetal bovine serum.
